# Supplementary material for: Molecular imprinting based on phosphorescent resonance energy transfer for malachite green detection in fishes and water
Source: Royal Society of Chemistry journal article supplement (doi:10.1039/c8nj01095a), 2018-01-01
Supplement: c8nj01095a1.pdf [file c8nj01095a1.pdf]

## Electronic Supplementary Material

### Molecular imprinting based on phosphorescent resonance energy transfer for malachite green detection in fishes and water

Shiqing Luo, Guiqin Yan,\* Xiaojie Sun

**Table of contents:**

**Table. S1** Effect of co-existing substances on the RTP intensity of 0.5 $\mu$ M MG.

**Table. S2** MG spiked recovery experiments with fishes and natural waters (mean $\pm$ s, n=3).

**Fig. S1** Effects of pH on RTP intensity of MIP-coated QDs.

**Fig. S2** Effects of time on RTP intensity of MIP-coated QDs.

**Fig. S3** Effects of NaCl concentration on RTP intensity of MIP-coated QDs.

**Table. S1** Effect of co-existing substances on the RTP intensity of 0.5 $\mu$ M MG.

| Co-existing substance         | [Co-existing substance] / [MG] | Change of the RTP Intensity (%) |
|-------------------------------|--------------------------------|---------------------------------|
| K <sup>+</sup>                | 1000                           | -1.3                            |
| Ca <sup>2+</sup>              | 50                             | +3.5                            |
| Mg <sup>2+</sup>              | 300                            | +5.2                            |
| HCO <sub>3</sub> <sup>-</sup> | 500                            | +3.4                            |
| Lys                           | 200                            | +2.9                            |
| Glu                           | 200                            | +4.3                            |
| Arg                           | 400                            | +3.8                            |
| Gly                           | 400                            | +1.4                            |

**Table. S2** MG spiked recovery experiments with fishes and natural waters (mean $\pm$ s, n=3).

| Type of samples   | MG spiked ( $\mu$ M) | Recovery (%) |
|-------------------|----------------------|--------------|
|                   | 0.2                  | 96 $\pm$ 5   |
| <i>C. idellus</i> | 2                    | 98 $\pm$ 6   |
|                   | 10                   | 107 $\pm$ 3  |
|                   | 0.2                  | 95 $\pm$ 5   |
| natural water     | 2                    | 101 $\pm$ 4  |
|                   | 10                   | 102 $\pm$ 4  |

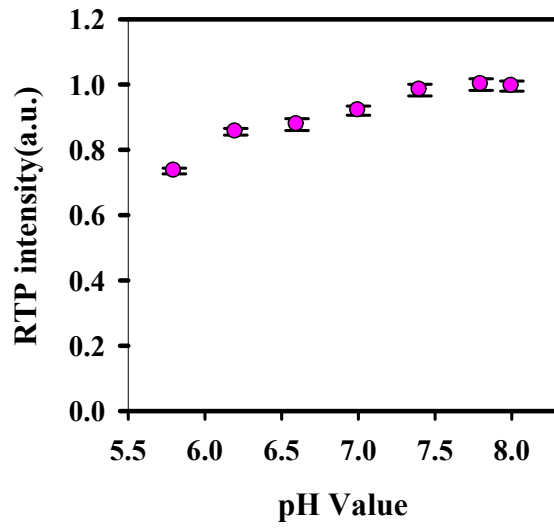

**Fig. S1** Effects of pH on RTP intensity of MIP-coated QDs.

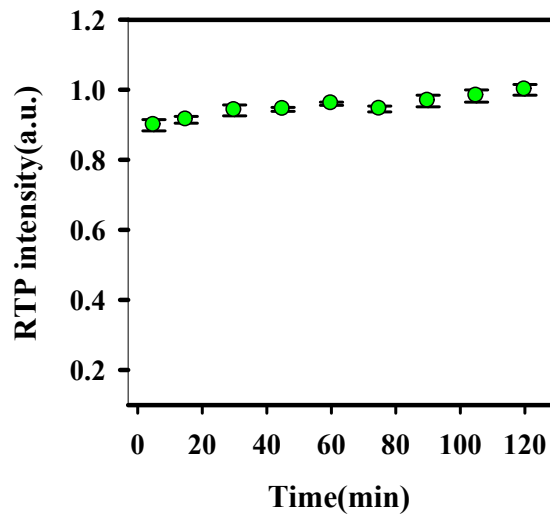

**Fig. S2** Effects of time on RTP intensity of MIP-coated QDs.

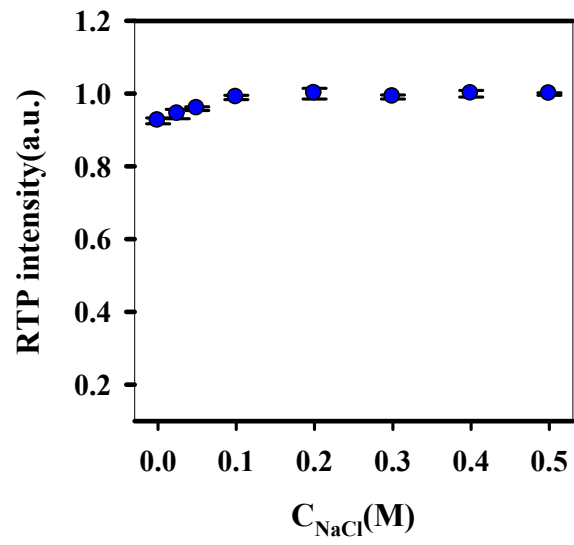

**Fig. S3** Effects of NaCl concentration on RTP intensity of MIP-coated QDs.
